# Supplementary material for: PsRNA: A Computing Engine for the Comparative Identification of Putative Small RNA Locations within Intergenic Regions
Source: PubMed Central journal article supplement — Genomics Proteomics Bioinformatics. 2010 Aug 4;8(2):127–34. doi: 10.1016/S1672-0229(10)60014-9 (PMC5054453; doi:10.1016/s1672-0229(10)60014-9), 2010-08-04
Supplement: mmc1.pdf [file mmc1.pdf]

## Supplementary Material

Sridhar, J., *et al.* 2010. PsRNA: a computing engine for the comparative identification of putative small RNA locations within intergenic regions. *Genomics Proteomics Bioinformatics* 8: 127-134.

DOI: 10.1016/S1672-0229(10)60014-9

Tables S1 and S2

**Table S1 124 gene pair IDs that sandwich the putative sRNA locations within the intergenic regions in five of the query genomes**

| sRNA             | <i>ecoI</i> * <sup>1</sup> | <i>KO pair</i> * <sup>2</sup> | <i>ecp</i>            | <i>ecv</i>                  | <i>eci</i>                  | <i>sec</i>         | <i>sbo</i>            |
|------------------|----------------------------|-------------------------------|-----------------------|-----------------------------|-----------------------------|--------------------|-----------------------|
| <i>c0299</i>     | b1182/<br>b1183            | K11139/<br>K03503             | ECP_1225/<br>ECP_1226 |                             |                             |                    |                       |
| <i>c0343</i>     | b1342/<br>b1343            | K03284/<br>K05591             | ECP_1395/<br>ECP_1397 | APECO1_494/<br>APECO1_495   | UTI89_C1613/<br>UTI89_C1614 | SC1651/<br>SC1650  | SBO_1719/<br>SBO_1718 |
| <i>c0465</i>     | b1886/<br>b1887            | K05875/<br>K03408             | ECP_1830/<br>ECP_1831 | APECO1_934/<br>APECO1_935   | UTI89_C2089/<br>UTI89_C2090 | SC1926/<br>SC1927  |                       |
| <i>c0664</i>     | b2711/<br>b2712            | K12265/<br>K04656             | ECP_2671/<br>ECP_2672 | APECO1_3815/<br>APECO1_3814 | UTI89_C3074/<br>UTI89_C3073 | SC2775/<br>SC2774  | SBO_2807/<br>SBO_2806 |
| <i>c0719</i>     | b2975/<br>b2976            | K03303/<br>K01638             | ECP_3052/<br>ECP_3053 | APECO1_3452/<br>APECO1_3451 | UTI89_C3391/<br>UTI89_C3392 |                    |                       |
| <i>csrC</i>      | b3865/<br>b3866            | K03978/<br>K09894             | ECP_4075/<br>ECP_4076 | APECO1_2597/<br>APECO1_2596 | UTI89_C4454/<br>UTI89_C4455 | SC3893/<br>SC3895  | SBO_3877/<br>SBO_3878 |
| <i>micF</i>      | b2215/<br>b2216            | K09475/<br>K07676             | ECP_2258/<br>ECP_2259 | APECO1_4344/<br>APECO1_4343 | UTI89_C2497/<br>UTI89_C2498 |                    | SBO_2092/<br>SBO_2091 |
| <i>oxyS</i>      | b3960/<br>b3961            | K01755/<br>K04761             | ECP_4176/<br>ECP_4173 | APECO1_2504/<br>APECO1_2507 | UTI89_C4554/<br>UTI89_C4551 | SC4014/<br>SC4013  | SBO_3980/<br>SBO_3979 |
| <i>mvpB</i>      | b3118/<br>b3124            | K07592/<br>K00865             | ECP_3211/<br>ECP_3214 | APECO1_3306/<br>APECO1_3303 | UTI89_C3553/<br>UTI89_C3555 |                    |                       |
| <i>rtt</i>       | b1227/<br>b1232            | K00374/<br>K01433             | ECP_1277/<br>ECP_1279 | APECO1_344/<br>APECO1_346   | UTI89_C1424/<br>UTI89_C1428 | SC1755/<br>SC1751  | SBO_1839/<br>SBO_1837 |
| <i>ryaA</i>      | b0069/<br>b0071            | K11925/<br>K01704             | ECP_0072/<br>ECP_0073 | APECO1_1912/<br>APECO1_1913 | UTI89_C0077/<br>UTI89_C0078 | SC0103/<br>SC0106  | SBO_0056/<br>SBO_0058 |
| <i>rybD</i>      | b00729/<br>b00730          | K01902/<br>K11922             |                       |                             |                             |                    | SBO_0587/<br>SBO_0588 |
| <i>ryeE</i>      | b2081/<br>b2086            | K08303/<br>K07029             | ECP_2125/<br>ECP_2127 |                             | UTI89_2360/<br>UTI89_2362   | SC2151/<br>SC2155  |                       |
| <i>ryeF</i>      | b1873/<br>b1874            | K07821/<br>K06201             | ECP_1818/<br>ECP_1819 | APECO1_923/<br>APECO1_924   | UTI89_C2077/<br>UTI89_C2078 |                    |                       |
| <i>rygB/sraE</i> | b2836/<br>b2837            | K01909/<br>K02529             | ECP_2849/<br>ECP_2850 |                             | UTI89_C3240/<br>UTI89_C3241 | SC2949/<br>SC2950  | SBO2728/<br>SBO2729   |
| <i>ryjB</i>      | b4302//<br>b4303           | K02773/<br>K06971             |                       |                             |                             | SC1611/<br>SC16112 |                       |
| <i>sokC</i>      | b0015/<br>b0019            | K03686/<br>K03313             |                       | APECO1_1964/<br>APECO1_1960 | UTI89_C0017/<br>UTI89_C0022 |                    | SBO_0016/<br>SBO_0018 |
| <i>spf</i>       | b3863/<br>b3865            | K02335/<br>K03978             | ECP_4074/<br>ECP_4075 | APECO1_2598/<br>APECO1_2597 | UTI89_C4452/<br>UTI89_C4454 | SC3891/<br>SC3893  | SBO_3876/<br>SBO_3877 |
| <i>sraA</i>      | b0438/<br>b0439            | K03544/<br>K01338             | ECP_0499/<br>ECP_0500 | APECO1_1573/<br>APECO1_1572 | UTI89_C0466/<br>UTI89_C0467 | SC0491/<br>SC0492  | SBO_0332/<br>SBO_0333 |
| <i>sraD</i>      | b2687/<br>b2688            | K07173/<br>K01919             |                       | APECO1_3834/<br>APECO1_3833 | UTI89_C3049/<br>UTI89_C3050 |                    | SBO_2830/<br>SBO_2829 |
| <i>sraG</i>      | b3164/<br>b3165            | K00962/<br>K02956             | ECP_3252/<br>ECP_3253 | APECO1_3266/<br>APECO1_3265 | UTI89_C3594/<br>UTI89_C3595 | SC3223/<br>SC3224  | SBO_3218/<br>SBO_3217 |
| <i>sraJ</i>      | b3801/<br>b3802            | K01130/<br>K02498             | ECP_3993/<br>ECP_3994 |                             | UTI89_C4359/<br>UTI89_C4361 |                    |                       |
| <i>sroA/TPP</i>  | b0068/<br>b0069            | K02064/<br>K11925             | ECP_0071/<br>ECP_0072 | APECO1_1914/<br>APECO1_1913 | UTI89_C0076/<br>UTI89_C0077 | SC0102/<br>SC0103  | SBO_0055/<br>SBO_0056 |
| <i>sroC</i>      | b0654/<br>b0655            | K10003/<br>K10001             | ECP_0677/<br>ECP_0678 | APECO1_1409/<br>APECO1_1408 | UTI89_C0650/<br>UTI89_C0651 | SC0692/<br>SC0693  | SBO_0517/<br>SBO_0518 |
| <i>sroD</i>      | b1804/<br>b1805            | K03684/<br>K01897             | ECP_1747/<br>ECP_1748 | APECO1_862/<br>APECO1_863   | UTI89_C1998/<br>UTI89_C1999 | SC1810/<br>SC1811  | SBO_1284/<br>SBO_1283 |
| <i>sroE</i>      | b2514/<br>b2515            | K01892/<br>K03526             | ECP_2519/<br>ECP_2520 | APECO1_4010/<br>APECO1_4009 | UTI89_C2835/<br>UTI89_C2836 | SC2519/<br>SC2520  | SBO_2538/<br>SBO_2539 |
| <i>sroG/FMN</i>  | b3041/<br>b3042            | K02858/<br>K09806             | ECP_3136/<br>ECP_3137 | APECO1_3366/<br>APECO1_3365 | UTI89_C3483/<br>UTI89_C3484 | SC3141/<br>SC3142  | SBO_2899/<br>SBO_2900 |
| <i>tke1</i>      | b2556/<br>b2557            | K07711/<br>K01952             | ECP_2558/<br>ECP_2559 | APECO1_3975/<br>APECO1_3974 | UTI89_C2876/<br>UTI89_C2877 | SC2559/<br>SC2560  | SBO_2584/<br>SBO_2585 |
| <i>tp2</i>       | b0113/<br>b0114            | K05799/<br>K00163             | ECP_0119/<br>ECP_0121 | APECO1_1872/<br>APECO1_1871 |                             | SC0150/<br>SC0151  | SBO_0102/<br>SBO_0103 |
| <i>tpke11</i>    | b0014/<br>b0015            | K04043/<br>K03686             | ECP_0014/<br>ECP_0015 | APECO1_1965/<br>APECO1_1964 | UTI89_C0016/<br>UTI89_C0017 | SC0012/<br>SC0013  | SBO_0015/<br>SBO_0016 |
| <i>t44</i>       | b0168/<br>b0169            | K01265/<br>K02967             | ECP_0176/<br>ECP_0177 | APECO1_1819/<br>APECO1_1818 | UTI89_C0182/<br>UTI89_C0183 | SC0215/<br>SC0216  | SBO_0156/<br>SBO_0157 |

Note: \*<sup>1</sup>Flanking gene pair(s) that sandwich known sRNAs in *eco*. \*<sup>2</sup>KO numbers of the sRNA specific flanking gene pairs that sandwich known sRNAs in *eco* collected from KEGG KO dataset (gray shade). Unique sRNA regions identified in the respective query genomes only from this study were shaded with tan color. New sRNA classes documented and identified in the query genomes were shaded with blue color (not available in Rfam database).



| <i>bcc</i>       | <i>bfl</i>     | <i>bpn</i>         | <i>ypl</i>                       | <i>ypp</i>            | <i>yen</i>     |
|------------------|----------------|--------------------|----------------------------------|-----------------------|----------------|
|                  |                |                    |                                  |                       | YE0022/ YE0023 |
|                  |                |                    | YpsIP31758_3408/YpsIP31758_3411  |                       |                |
|                  |                |                    | YpsIP31758_1207? YpsIP31758_1208 | YPDSF_2205/YPDSF_2206 | YE1099/YE1100  |
|                  |                |                    | YpsIP31758_0972/ YpsIP31758_0975 | YPDSF_1710/YPDSF_1712 | YE3327/YE3331  |
|                  |                |                    | YpsIP31758_3465/YpsIP31758_3464  | YPDSF_3162/YPDSF_3161 | YE0610/YE0611  |
|                  | BFL247/ BFL299 | BPEN_645/BPEN_644  |                                  |                       |                |
|                  | BFL108/ BFL107 | BPEN_112/ BPEN_111 | YPSIP31758_3233/YPSIP31758_3234  |                       | YE0438/ YE0437 |
|                  |                |                    |                                  | YPDSF_1046/YPDSF_1047 |                |
|                  |                | BPEN_550/BPEN_551  | YpsIP31758_0567/YpsIP31758_0566  | YPDSF_0441/YPDSF_0440 | YE3669/YE3671  |
|                  | BFL114/ BFL115 | BPEN_118/ BPEN_119 |                                  |                       | YE0698/ YE0699 |
|                  | BFL270/ BFL271 | BPEN_278/BPEN_279  |                                  | YPDSF_3163/YPDSF_3162 | YE0609/ YE0610 |
| BCC_141/ BCC_142 |                |                    |                                  |                       |                |

Note: Unique sRNA regions identified in the respective query genomes only from this study were shaded with tan color. New sRNA classes documented and identified in the query genomes were shaded with blue color (not available in Rfam database).

| <i>ecj</i>      | <i>ent</i>              | <i>kpn</i>           |
|-----------------|-------------------------|----------------------|
| JW1336/ JW1337  |                         |                      |
|                 | ENT638_3183/ENT638_3185 | KPN_03046/KPN_03048  |
| JW0068/JW0070   | ENT638_0616/ENT638_0619 |                      |
| JW0718/JW0719   |                         |                      |
| JW2066/JW2070   | ENT638_2698/ENT638_2701 | KPN_02532/KPN_02533  |
| JW2804/JW2805   | ENT638_3277/ENT638_3278 | KPN_03245/KPN_03246  |
| JW4264/JW4265   |                         |                      |
| JW0014/JW0018   | ENT638_0579/ENT638_0580 | KPN_00015/KPN_00016  |
| JW5930/ JW3835* |                         | KPN_00400/KPN_00401  |
|                 | ENT638_3601/ENT638_3602 |                      |
| JW0067/JW0068   | ENT638_0615/ENT638_0616 | KPN_00067/KPN_00068  |
|                 | ENT638_3453/ENT638_3454 | KPN_03454/KPN_03455  |
|                 |                         | KPN_00014/ KPN_00015 |
